# Supplementary material
Source: publisher figshare collection journal article supplement (https://frontiersin.figshare.com/ndownloader/files/31747577)
Supplement: Supplementary file [file 31747577]

## Appendix 2 - 16-item FP

The following statements describe everyday behaviors and situations. Please indicate the degree to which each statement reflects you on a scale of 1–7, where 1 represents the answer "never true about me", and 7 the answer "always true about me". Please mark the number that best describes you.

- 1 It happens that I am unrealistic regarding arrival time estimation.
- 2 It happens that after reading a paragraph I need to read it again because I was not concentrating.
- 3 I tend to be late or to arrive at the last moment.
- 4 I take risks hoping to advance myself in life.
- 5 I like doing things that lead to suspense and excitement.
- 6 I am punctilious and precise in what I do.
- 7 I work according to a diary and a detailed timetable which I prepare.
- 8 I adhere to all traffic rules while driving.
- 9 I tend to "round corners" in order to further my work and to finish on time.
- 10 It happens that I do not adhere to a certain rule/instruction at work because it appears irrelevant.
- 11 I have difficulty in following what is said in a meeting with numerous participants.
- 12 It happens that I go somewhere without remembering what for when reaching it.
- 13 I daydream.
- 14 I tend to attach utmost importance to adherence to rules and directives.
- 15 It happens that I ignore accepted instructions in order to complete a task faster.
- 16 I familiarize myself carefully with the practices of a new place to which I am heading (foreign country, new workplace etc.).
